# Supplementary material
Source: PubMed Central journal article supplement (PMC7528799)
Supplement: rccm.201911-2151OC_phalke_data_supplement.pdf [file rccm.201911-2151OC_phalke_data_supplement.pdf]

## **Age Associated B Cells Appear in Patients with Granulomatous Lung Diseases**

Swati Phalke, Katja Aviszus, Kira Rubtsova, Anatoly Rubtsov, Briana Barkes, Linda Powers, Brenda Warner, James L Crooks, John W. Kappler, Evans R. Fernández-Pérez, Lisa A. Maier, Nabeel Hamzeh and Philippa Marrack

ONLINE DATA SUPPLEMENT

## Online Data Supplement

### Supplementary Figure Legends

**Supplementary Figure 1. Gating strategy to identify ABC-like cells.** Shown is the gating strategy for different populations of B cells in peripheral blood cells. The example shown is from a SarcP. Antibodies used are listed in Table 1.

**Supplementary Figure 2. CD19 is at higher levels on ABC-like cells than on mature naive B cells or CD11c+ CD21lo cells that are T-betneg.** Peripheral blood cells from HS, SarcP and SarcPT were gated as described in Figure 1. Shown are; A The percentage of PBMCs that were B cells in HS and SarcP, the two groups stained and analyzed in a single experiment B The percentage of PBMCs that were B cells in HS and SarcPT, the two groups stained and analyzed in a single experiment, C-E CD19 levels on CD11c- CD21med-hi B cells (other B cells) CD11c+ Cd21lo T-betneg-lo B cells and CD11c+ Cd21lo T-bethi B cells. C B cell populations from HS analyzed with Kruskal-Wallis test with Dunns post test. \*  $p < 0.05$ . D B cell populations from SarcP analyzed as described in C. , \*\*  $p < 0.01$ , \*\*\*  $p < 0.001$  E Comparison of CD19 levels on CD11c+ CD21lo T-bethi cells from HS versus SarcP. Data were analyzed with a Mann Whitney test. \*  $p < 0.05$ .

**Supplementary Figure 3. Analysis of the levels of FcRL1-5 on several B cell populations in HS or SarcP on therapy** A Peripheral blood cells from HS were stained to identify B cells (CD19+) and these cells were stained with antibodies to CD11c and CD21 and, separately, with antibodies against FcRL1-5 or isotype control antibodies B cells were gated for expression of CD11c and low levels of CD21 (ABC-

like cells) or for no expression of CD11c and expression of C21med-hi and the levels of staining with the various anti-FcRL antibodies analyzed. *A.* Cells from HS *B* Cells from SarcP all of whom were on therapy except SarcP 8 who was not being treated for disease.

**Supplementary Figure 4. Analysis of FcRL1-5 expression on B cells expressing different amounts of CD11c suggests that B cells that are destined to convert to ABC-like cells are at different stages of conversion.** ABC-like cells from the peripheral blood B cell samples shown in Supplementary Figure 4 were divided into 3 categories depending upon the level of CD11c they bore. The levels of FcRLs expressed by each category in each HS (Supplementary Figure 5A) or in each SarcP +/- therapy (Supplementary Figure 5B) were then analyzed.

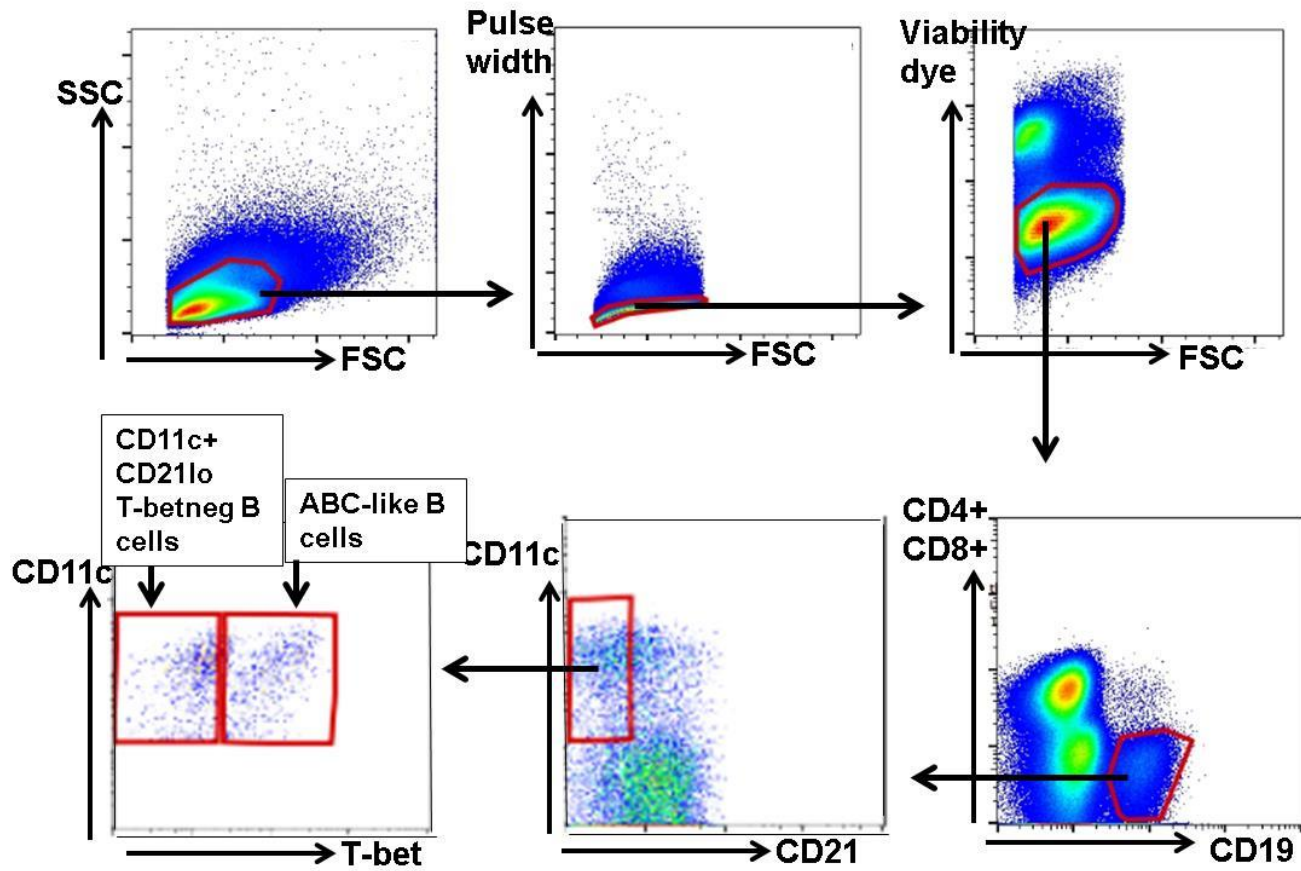

Supplementary Figure 1

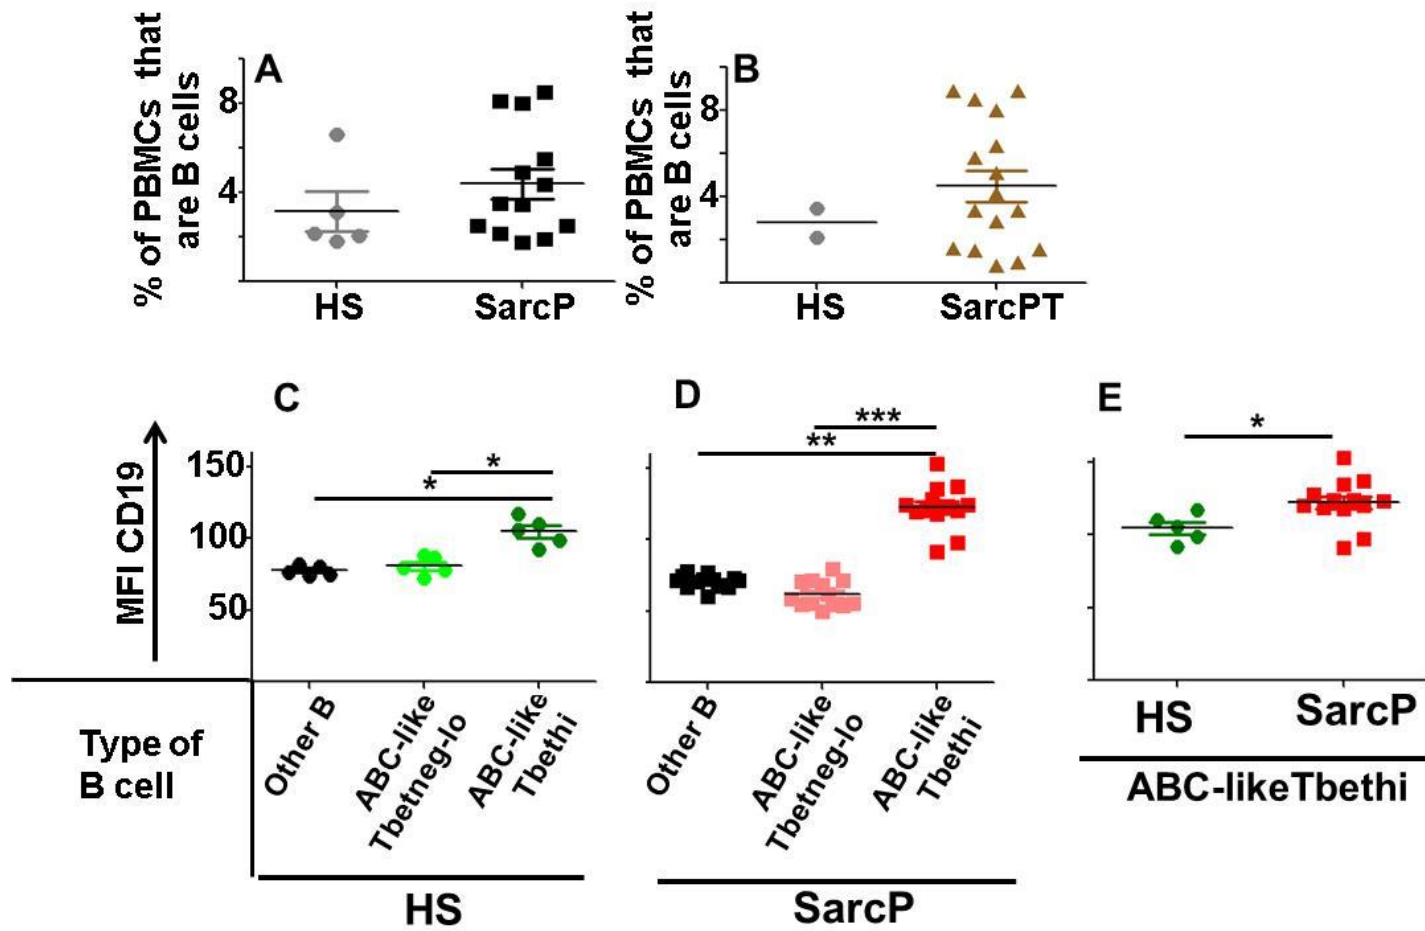

Supplementary Figure 2

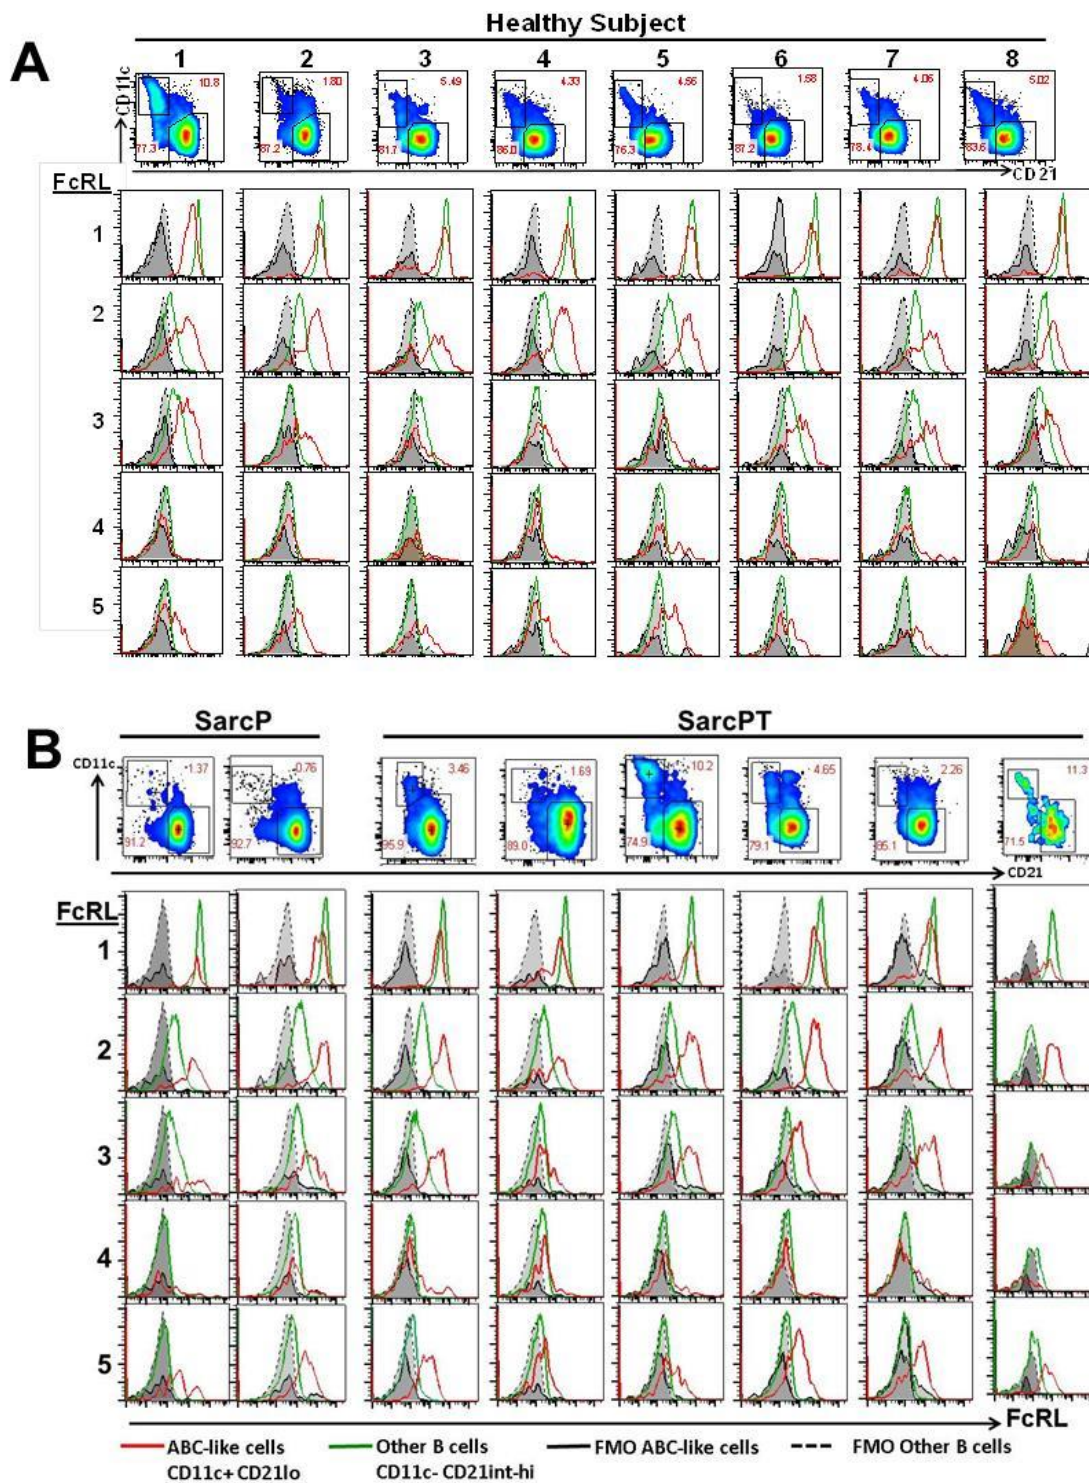

Supplementary Figure 3

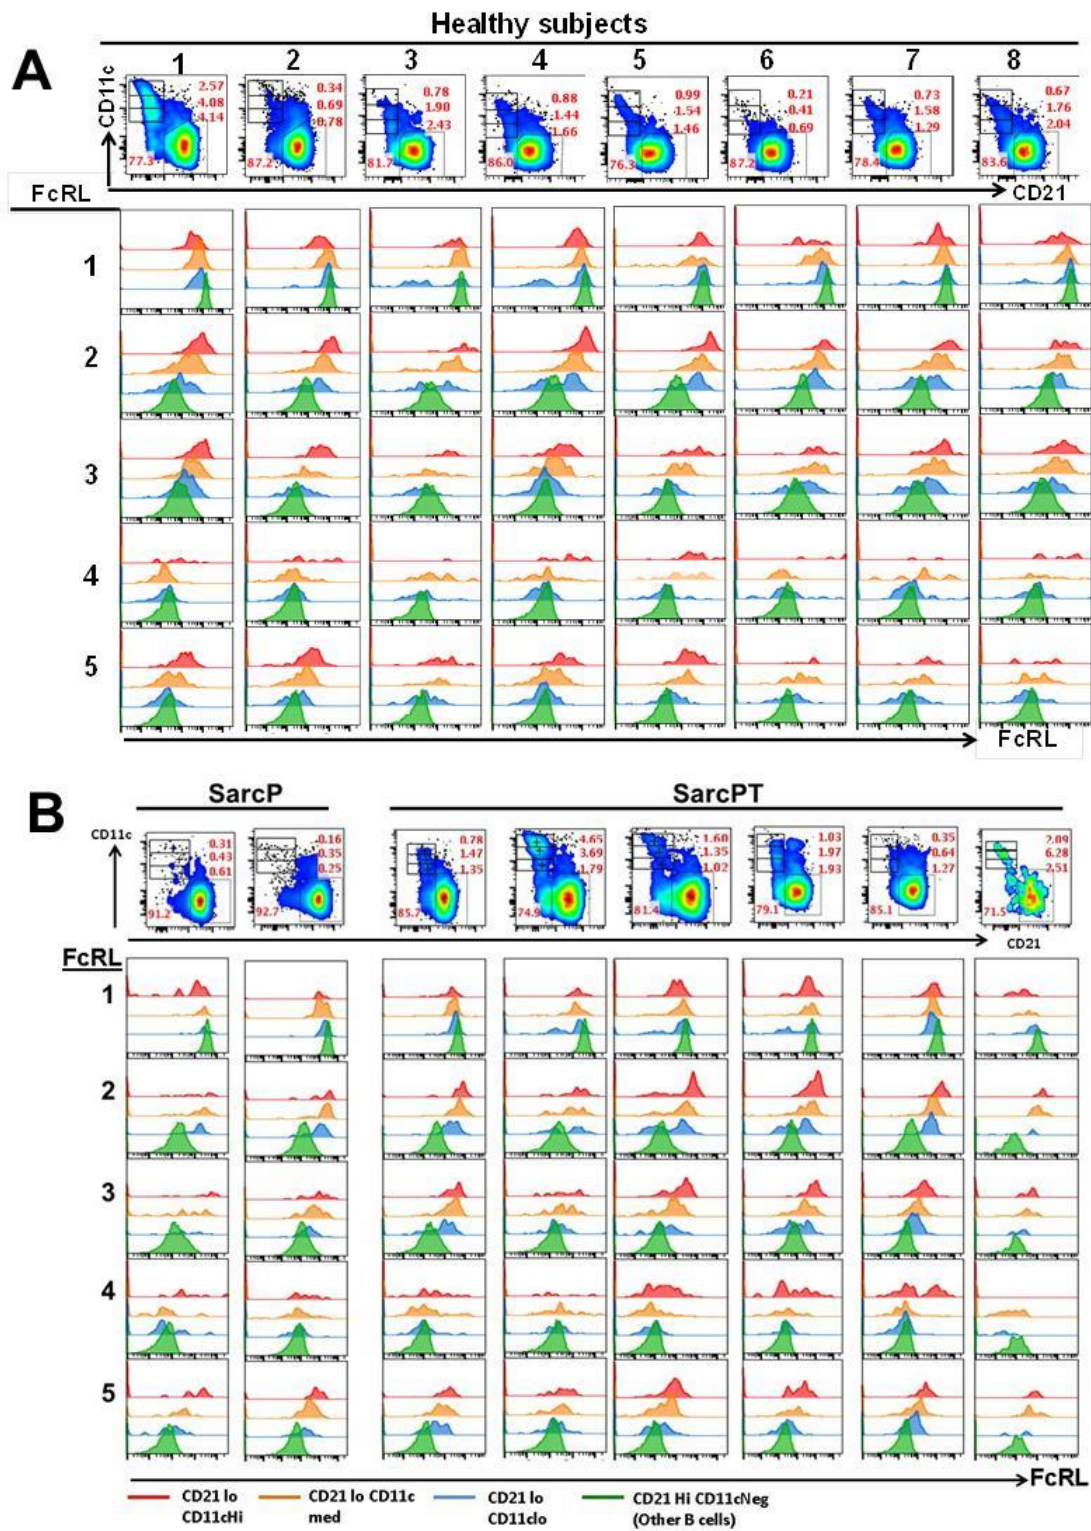

Supplementary Figure 4

| <b>Supplementary Table 1 Antibodies used in flow cytometry analyses</b> |                     |              |                |                         |
|-------------------------------------------------------------------------|---------------------|--------------|----------------|-------------------------|
| <b>Target</b>                                                           | <b>Fluorochrome</b> | <b>Clone</b> | <b>Source</b>  | <b>Catalogue number</b> |
| live cells                                                              | PB                  |              | BioLegend      | 423113                  |
| CD3                                                                     | BV605               | OKT3         | BioLegend      | 317322                  |
| CD4                                                                     | FITC                | OKT4         | BioLegend      | 317408                  |
| CD4                                                                     | PerCP               | L200         | BDPharmingen   | 550631                  |
| CD8                                                                     | FITC                | HIT8a        | BioLegend      | 300906                  |
| CD8                                                                     | PerCP               | SK1          | BioLegend      | 344708                  |
| CD11b                                                                   | BV421               | ICRF44       | BioLegend      | 301324                  |
| CD11b                                                                   | PE                  | ICRF44       | BD Biosciences | 561001                  |
| CD11c                                                                   | PECy7               | 3.9          | Invitrogen     | 25-0116-42              |
| CD19                                                                    | FITC                | HIB19        | eBioscience    | 11-0199-42              |
| CD19                                                                    | APCCy7              | HIB19        | BioLegend      | 302217                  |
| CD21                                                                    | APC                 | HB5          | eBioscience    | 17-0219-42              |
| CD307a/FcRL1                                                            | PE                  | E3           | BD Pharmingen  | 566457                  |
| CD307b/FcRL2                                                            | PE                  | 296902       | BioLegend      | FAB2048P                |
| CD307c/FcRL3                                                            | PE                  | H5/FcRL3     | BioLegend      | 374405                  |
| CD307d/FcRL4                                                            | PE                  | 413D12       | BioLegend      | 340203                  |
| CD307e/FcRL5                                                            | PE                  | 509f6        | BioLegend      | 340304                  |
| Tbet                                                                    | PE                  | eBio4B10     | eBioscience    | 12-5825-82              |
| Tbet                                                                    | AF488               | 4B10         | BioLegend      | 644830                  |
| Mouse IgG1 control                                                      | PE                  | MOPC21       | BD             | 554680                  |
| Mouse IgG2a control                                                     | PE                  | G155-178     | BD             | 556653                  |
| Mouse IgG2b control                                                     | PE                  | 27-35        | BioLegend      | 402204                  |
